# A novel $\alpha/\beta$ T-cell subpopulation defined by recognition of EPCR

Elena Erausquin<sup>1,2,3\*</sup>, María Morán-Garrido<sup>4\*</sup>, Jorge Saiz<sup>4</sup>, Coral Barbas<sup>4</sup>, Gilda Dichiararodríguez<sup>1,3</sup>, Natalia Ramírez<sup>2,3,5,6†</sup>, Jacinto López-Sagaseta<sup>1,2,3 †‡</sup>

<sup>1</sup> Unit of Protein Crystallography and Structural Immunology, Navarrabiomed, 31008, Navarra, Spain.

<sup>2</sup> Public University of Navarra (UPNA), Pamplona, 31008, Navarra, Spain.

<sup>3</sup> Navarra Hospital Complex (CHN), Pamplona, 31008, Navarra, Spain.

<sup>4</sup> Centro de Metabolómica y Bioanálisis (CEMBIO), Facultad de Farmacia, Universidad San Pablo-CEU, CEU Universities, Urbanización Montepríncipe, 28660, Boadilla del Monte, Spain.

<sup>5</sup> Unit of Oncohematology, Navarrabiomed, Pamplona, 31008, Navarra, Spain.

<sup>6</sup> Instituto de Investigación Sanitaria de Navarra (IdiSNA).

\* Contributed equally.

‡ Lead author.

† To whom correspondence should be addressed:

[jacinto.lopez.sagaseta@navarra.es](mailto:jacinto.lopez.sagaseta@navarra.es); [natalia.ramirez.huerto@navarra.es](mailto:natalia.ramirez.huerto@navarra.es)

## Abstract:

T-cell self-recognition of antigen presenting molecules is led by antigen-dependent or independent mechanisms. The endothelial protein C receptor (EPCR) shares remarkable similarity with CD1d, including a lipid binding cavity. We have identified EPCR-specific  $\alpha/\beta$  T-cells in the peripheral blood of healthy donors. The average frequency in the CD3<sup>+</sup> leukocyte pool is comparable to other autoreactive T-cell subsets that specifically bind MHC-like receptors. Alteration of the EPCR lipid cargo, revealed by X-ray diffraction studies, points to a prevalent, yet not exclusive, lipid-independent self-recognition. In addition, we solve the EPCR lipidome, and detect species not yet described as EPCR ligands. These studies report, for the first time, novel recognition by circulating  $\alpha/\beta$  T-cells and provide grounds for EPCR and lipid mediated T-cell restriction.

## 33 Introduction

34

35 T-cell recognition of major histocompatibility complex (MHC) and MHC-like molecules is  
36 intricate given the varied nature of antigens involved such as exogenous or self-ligands in the  
37 form of peptides, lipids or vitamin metabolites<sup>1-5</sup>. This diversity is broadened given that T-  
38 cell engagement not always follows a canonical antigen-mediated binding<sup>6</sup>. Further, non-  
39 canonical target sites have been found away from the antigen-binding cleft<sup>7</sup>. Additional  
40 diversity is provided by the wide spectrum of antigen presenting molecules, such as major  
41 histocompatibility complex (MHC) class I and II molecules<sup>4,5</sup>, CD1 family of receptors<sup>8</sup> or  
42 MR1<sup>9</sup>, that can interact with T-cells. Recognition of MHC and MHC-like proteins by T-cells  
43 is often restricted by the presence of a foreign antigen, but other interactions respond to self-  
44 recognition, with scanty weight for the bound ligand. Altogether, T-cell reactivity is highly  
45 diverse with recognition patterns heterogeneously distributed across antigen presenting  
46 molecules. The endothelial protein C receptor (EPCR) is a transmembrane MHC class I-like  
47 glycoprotein of approximately 45 kDa, composed of alpha 1 and 2 extracellular domains, a  
48 transmembrane region and a short cytoplasmic tail<sup>10,11</sup>. Structurally, EPCR shares a notable  
49 degree of homology with the CD1 family of receptors, including the presence of a lipid  
50 binding cleft characterized by a hydrophobic chemistry<sup>10-12</sup>.  $\alpha/\beta$  T-cells recognize CD1  
51 antigen-presenting molecules by means of lipid-driven restriction or self-reactivity<sup>2,13-15</sup>. The  
52 structural analogy with CD1d, the lipid-binding properties, along with the wide spectrum of  
53 cell types where EPCR is found, including macrophages<sup>16</sup> and dendritic cells<sup>17</sup>, prompted us  
54 to explore the existence of circulating  $\alpha/\beta$  T-cell subpopulations with unique EPCR-mediated  
55 self-recognition. In this study, we reveal a novel  $\alpha/\beta$  T-cell subset that specifically recognizes  
56 EPCR. In addition, we decipher the EPCR lipidome and identify lipid species not previously  
57 linked to this receptor, which suggests a CD1-like potential for lipid restriction and  
58 modulation of T-cells. Altogether, these findings contribute new pieces of the broadly diverse  
59 human T-cell interactome.

60

## 61 Results

62

### 63 *Identification of EPCR self-recognizing $\alpha/\beta$ T-cells*

64

65 The presence of EPCR self-recognition developed by lymphocyte cells was analyzed in four  
66 healthy subjects. A significant number of monocyte-depleted PBMCs was processed from  
67 four healthy individuals and stained with phycoerythrin (PE)-labeled streptamers, different T-  
68 and B-cell lineage specific-antibodies and a viability dye (Fig. S1 and Table S1). Streptamers  
69 (ST) were originally developed for the detection of low-affinity human T-cells reactive to  
70 MHC-peptide complexes. Following this conception, we produced recombinant twinstrep-  
71 tagged soluble EPCR (EPCR) and combined it with streptactin-PE to assemble EPCR-ST  
72 complexes. As has been seen for CD1 molecules, recombinant EPCR produced in insect cells  
73 is filled with endogenous (endo) lipids, primarily phosphatidylcholine, that load into EPCR  
74 hydrophobic cavity. Because we observed a lack of continuous electron density signal in the  
75 cavity of Tween® 20 (T20)-treated EPCR, we reasoned that treatment of endo-EPCR with  
76 T20 released a significant amount of lipids. Thus, in order to discriminate a role for the lipids

77 bound to EPCR in cell staining, we compared the extent of the labeling using endo-EPCR-ST  
78 and T20-EPCR-ST. As reference, we used empty streptamers and TCR-reactive lipid  
79 presenting molecules. More specifically, ST backbone, T20-treated CD1d-ST, endo-CD1d-  
80 ST and PBS44-loaded CD1d-ST. Further, a high-sensitivity cytometric analytical method was  
81 also used as internal control with the aim to increase the specificity and sensitivity of the  
82 methodology employed, thus eliminating any non-specific staining. A specific and bright  
83 staining of EPCR-ST<sup>+</sup> cells was detected in all individuals (subjects 1-4) in the viable  
84 CD3<sup>+</sup>CD14<sup>-</sup>CD19<sup>-</sup>CD45<sup>+</sup> T-cell pool (Fig. 1A-B). Although the lipid load of EPCR did not  
85 have a severe impact on the frequency of staining, the percentage of endo-EPCR-ST<sup>+</sup> cells  
86 show a tendency (0.015 % vs 0.011 %, average values) to slightly higher staining than those  
87 cells labeled with T20-EPCR-ST (Fig. 1 A-B and Fig. S2 and S5). This trend was boosted  
88 when T20-CD1d-ST was tested, our internal control for the presence of lipid-independent  
89 self-recognition, and which showed an average frequency of 0.009 %. As expected, endo-  
90 CD1d and PBS44-CD1d significantly increased the positivity rates (Fig. S2). The intra-assay  
91 repeatability was 0.00234 (standard deviation for six replicates, donor 1, Fig. S3).  
92 We investigated the phenotype of the endo-EPCR-ST<sup>+</sup> cells. Like the phenotypic profile  
93 shown by endo-CD1d-ST<sup>+</sup> cells across different individuals, the analysis of endo-EPCR-ST<sup>+</sup>  
94 cells resulted in a matching and homogeneous phenotype, where the expression of CD3  
95 antigen and the direction of the CD4/CD8 ratio was alike (Fig. 2A and Fig. S6). Likewise, we  
96 also found minimal presence of CD3<sup>+</sup>CD4<sup>-</sup>CD8<sup>-</sup> double negative (DN) cells and nearly  
97 complete lack of CD3<sup>+</sup>CD4<sup>+</sup>CD8<sup>+</sup> double positive (DP) subpopulation. Moreover, when the  
98 expression of the type of TCR chain was studied in endo-EPCR-ST<sup>+</sup>,  $\alpha/\beta^+$  ( $\gamma/\delta^-$ ) cells were  
99 highly enriched (> 93%) in this specific-cluster in all subjects studied (Fig. 2A and Fig. S7).  
100 We also analyzed the expression of the natural killer (NK) marker CD56 in the endo-EPCR-  
101 ST<sup>+</sup> subpopulation. We observed that both endo-EPCR-ST<sup>+</sup> and endo-CD1d-ST<sup>+</sup>  
102 subpopulations presented low values of CD56<sup>+</sup> cells (Fig. 2B, right panel). In the same way  
103 that other authors have described, an unusual CD3-ST<sup>+</sup> cluster was found in all samples  
104 analyzed with CD1d-ST and EPCR-ST. We then determined whether these undefined events  
105 belonged to a particular leukocyte subpopulation. As performed above, the polychromatic  
106 analysis was tuned in order to eliminate background noise caused by non-specific staining  
107 derived from dead cells, monocytes, and B lymphocytes. In this sense, a high proportion of  
108 the CD3-ST<sup>+</sup> cells (59-82%) expressed CD56 on their membrane (Fig. 2B, left panel) but  
109 lacked TCR expression, thus corroborating the presence of TCR-independent surface ligands  
110 for CD1d<sup>18</sup> and EPCR in NK cells. Taken together, these results indicate the presence of  
111 self-recognizing endo-EPCR-specific  $\alpha/\beta$  T lymphocytes in the human PBMC pool.

112

113 *X-ray studies reveal drastic changes in EPCR lipid load upon treatment with T20.*

114

115 To investigate the molecular basis of EPCR recognition by  $\alpha/\beta$  T-cells, and discriminate  
116 whether EPCR-mediated staining was lipid-dependent, we performed X-ray analyses to  
117 confirm an alteration in the EPCR lipid load upon exposure to T20. Thus, EPCR was  
118 incubated with 0.05% (v/v) T20 for 18 hours. We recovered the protein fraction from this  
119 mixture, removed the excess of detergent and grew crystals with both T20-treated EPCR and  
120 intact endo-EPCR. Full datasets to 1.85 Å and 1.95 Å (Table S2), respectively, were

121 collected, processed and the structures solved. The overall architecture of EPCR was  
122 preserved (Fig. 3), showing the classical alpha 1 and 2 helices laying over an extended beta  
123 sheet. In all cases, the structure of EPCR is highly similar to that of CD1d (Fig. S9 and S10).  
124 Minor displacements were observed in the alpha 2 helix, in particular in the 150-160 helical  
125 segment (Fig. S10). The backbone of T20-EPCR alters its position with respect to that of  
126 EPCR, displaying a modest shift away from the binding pocket. Nonetheless, the most  
127 remarkable finding was in the lipid binding cleft, as treatment with T20 resulted in a deep  
128 change in the electron density signal around the phospholipid bound in intact EPCR, as  
129 shown by Fo-Fc omit maps (Fig. 3). Electron density is strong and continuous in the intact  
130 EPCR structure, depicting the frame of a bound diacyl phospholipid. On the contrary, the  
131 signal for the lipid region in the T20-EPCR is sharply altered. Overall, an intense yet  
132 drastically discontinuous signal is observed in the binding pocket. Superposition of the  
133 phospholipid molecule found in intact EPCR with this electron density shows an out of place  
134 signal incompatible for such lipid. More in detail, a tubular shaped signal is present in the A'  
135 pocket together with an isolated blob of unknown identity. The F' pocket is also filled with  
136 an extended Fo-Fc signal that forks near Gln75. Both signals in A' and F' pockets do not  
137 appear linked one another. These results indicate that EPCR exposed to T20 loses the  
138 phospholipid and the hydrophobic groove is filled with alternative non-polar molecules.  
139 Together with the phenotypic characterization assays, analyses of X-ray diffraction suggest  
140 that T-cell reactivity to EPCR is led by a lipid-independent mechanism.  
141 Still, flow cytometry studies showed a bias towards slightly lower frequency of EPCR-  
142 specific T-cells when T20-treated EPCR streptamers were used. Therefore, because an utterly  
143 lipid-independent staining was not observed, and to gain insights into the endogenous lipid  
144 load we solved the EPCR lipidome.

145

#### 146 *The EPCR lipidome*

147

148 LC-MS analyses yield a total of 41 different lipids identified (Table S3 and Fig. 4), of which  
149 38 and 32 were determined in positive and negative ionization mode, respectively. Thirty-one  
150 of these lipids could be detected in both ionization modes providing a greater confidence in  
151 their identification.

152 Fig. 4C shows a distribution of relative abundances for each lipid class present in the EPCR.  
153 For this, four samples were prepared and analyzed and the lipids present in at least three of  
154 those samples are described here. The main lipid category found in EPCR was the  
155 glycerophospholipid (GPL) class, counting up to 98% of the total lipid population. Within  
156 this class, phosphatidylcholines (PC) constitute the most abundant species (Fig. 4A and 4C),  
157 making up to 85% of the total lipids. Phosphatidylethanolamines (PE) (12%),  
158 phosphatidylinositols (PI) (0.96%), phosphatidylserines (PS) (0.29%) and lyso forms  
159 containing just one acyl chain, such as lysophosphatidylcholine (LPC) (0.029%) and  
160 lysophosphatidylethanolamine (LPE) (0.0071%), were also found in smaller amounts.  
161 Ceramides (Cer), sphingomyelins (SM) and diacylglycerols (DG) were found as well in very  
162 small proportions (0.60%, 1.3% and 0.26%, respectively; Figs. 4B and 4C). We could only  
163 detect fatty acids in a control sample containing the insect cell culture growing medium.

164 The identification of each lipid was based on their m/z, MS/MS spectra (Fig. 5) adduct  
165 formation distribution, and collisional cross section (CCS) values obtained from ion mobility

166 (IM). Table S3 shows the CCS values obtained for selected adducts of these lipids, which  
167 were confirmed in the CCSBase (<https://ccsbase.net>). The average error associated to each  
168 experimental CCS determination was 0.37%, which is in agreement with the error associated  
169 to single-field CCS determination<sup>19</sup>. As shown in Fig. S12, the fitting of the investigated data  
170 was excellent, supporting the IM data the identification of the lipids.

171 Analyzing acyl chain compositions, several chain lengths and double bond distributions could  
172 be found, especially in those major lipid classes. Acyl chains of 16 and 18 carbons were the  
173 most frequent in both sn-1 and sn-2 positions (Fig. 6), being present in practically all lipid  
174 classes. Longer chains could be found, mainly in the sn-1 position and never exceeding 22  
175 carbon atoms. Interestingly, as opposed to Cys13 and Leu161 in CD1d, which allows  
176 arrangement of sn-1 acyl within the A' pocket, EPCR contains bulkier methionine and  
177 phenylalanine residues, which suggests a more severe restriction for long acyl groups (Fig.  
178 S11).

179 Regarding unsaturations, most sn-1 chains had either 0 or 1 double bond, but higher degrees  
180 of unsaturation were detected, and in some species, presenting up to 6 double bonds.  
181 Interestingly, sn-2 chains presented a much lower complexity and 1 double bond is the most  
182 prevalent insaturation (Fig. 6).

183 Despite being several lipid classes with different chain chemistries, it was clear that the major  
184 lipid bound to EPCR was PC 18:1/16:1, closely followed by PC 18:1/18:1 and PC 16:0/18:1  
185 (Figs. 4A and 5A). Distribution of PE was near identical to that of PC. Although much less  
186 abundant than PC; PE 18:1/18:1, PE 18:1/16:1 and PE 16:0/18:1 were the three major PE  
187 species.

188 In conclusion, our analyses reveal a heterogeneous array of lipids with novel species bound to  
189 EPCR.

190

### 191 *X-ray diffraction studies reveal lipid heterogeneity in EPCR*

192

193 To complement the MS findings in EPCR lipid heterogeneity, we pursued X-ray diffraction  
194 studies. Apart from those obtained in P3<sub>1</sub>21 space group, we obtained EPCR crystals in two  
195 additional space groups, C222<sub>1</sub> and P2<sub>1</sub>2<sub>1</sub>2<sub>1</sub>. Crystals contained 2 and 4 molecules of EPCR  
196 per asymmetric unit, respectively. In all cases, diffraction datasets were processed at 1.95 Å  
197 resolution (Table S2). Electron density maps were of good quality overall and accurately  
198 traced EPCR backbone and side chains. EPCR structures in both space groups show a  
199 conserved CD1-like α1-α2 scaffold depicting two alpha chains that seat over a beta sheet,  
200 creating a hydrophobic binding site. As for CD1 molecules, two pockets, referred as A' and  
201 F', are found in EPCR groove and provide adequate chemistry to suit alkyl-based ligands  
202 such as di-acyl lipids. As for EPCR crystals in P3<sub>1</sub>21 space group, we observed an intense  
203 electron density pattern within the groove whereby an Fo-Fc (Fig. 4 and Fig. S13) While  
204 there is a strong signal for the diacyl scaffold and the phosphate, the signal for the outermost  
205 region does not allow complete discrimination of the functional group covalently bound to  
206 the phosphate. Moreover, EPCR crystals in space group C222<sub>1</sub> present a discontinuous Fo-Fc  
207 electron density with more evident signal for a phosphate group, glycerol and hydrophobic  
208 tail regions. Together, these results support a conserved and preferent hydrophobic and buried



209 GPL backbone in EPCR bound lipid species, but a diverse or not structurally locked polar  
210 moiety.

## 211 **Discussion**

212

213 Given the high structural analogy to CD1d, a lipid binding site and the expression of EPCR in  
214 a wide spectrum of cell types, including antigen presenting cells, we interrogated the  
215 presence of T-cell reactivity to EPCR in human peripheral blood. We detected viable  
216 CD3<sup>+</sup>CD14<sup>-</sup>CD19<sup>-</sup>CD45<sup>+</sup> endo-EPCR-ST<sup>+</sup> cells in four healthy individuals. The frequency  
217 found for the EPCR-specific T-cell subset was low, ranging from 0.006 to 0.021 % of all  
218 circulating T cells in the four donors tested. However, this is expected for autoreactive T-cells  
219 in peripheral blood of healthy subjects (Fig. S4). For instance, frequencies below 0.003 and  
220 0.02 % are detected, respectively, for CD1b and CD1c self-recognizing polyclonal T-cells<sup>20</sup>.  
221 Moreover, in a recent work, Le Nours *et al.* identify a heterogeneous subset of MR1-  
222 autoreactive  $\gamma/\delta$  T-cells whose frequency in peripheral blood of CD3<sup>+</sup> leucocytes  
223 encompasses frequencies from 0.001 to 0.1 %<sup>7</sup>. Therefore, growing evidences point to the  
224 presence of sparsely abundant self-recognizing peripheral T-cell panels in physiological  
225 conditions, that might nonetheless lead to a clinical setting in individuals with autoimmune  
226 disease. In this line, the high expression levels of EPCR in the endothelium suggest a  
227 potential role for EPCR-T-cells in vascular autoimmune disorders.

228 We explored the molecular basis leading to this EPCR autorecognition. We analyzed the lipid  
229 content of EPCR after exposure to the nonionic surfactant T20 and noticed a severe impact,  
230 as pictured by sharp changes in electron density signals in the A' and F' lipid binding pockets.  
231 Thus, treatment with T20 results in the absence of solvent exposed and accesible lipid heads.  
232 T20-treated EPCR streptamers stained a subpopulation with similar phenotype, however with  
233 a moderately reduced frequency when compared with that obtained with non-treated EPCR  
234 streptamers. Hence, recognition of EPCR is predominantly lipid independent. An alternative  
235 possibility is antigen permissiveness, whereby TCR binding is enabled by buried lipids, while  
236 surface exposed antigens hindered TCR docking. This mechanism of T-cell self-recognition  
237 has been reported for CD1a and CD1c<sup>20,21</sup>. Antigen permissiveness is likewise an alternative  
238 explanation for self-recognition of CD1d-lysophosphatidylcholine complex by the invariant  
239 NKT J24.L17 clone<sup>22</sup>. Indeed, we prepared T20-treated CD1d streptamers, and obtained a  
240 comparable staining pattern yet with a lower frequency trend in the CD3<sup>+</sup>CD14<sup>-</sup>CD19<sup>-</sup>  
241 CD45<sup>+</sup>T20-CD1d-ST<sup>+</sup> subset. To further assess this recognition, we compared the staining  
242 with CD1d loaded with either endogenous lipids derived from the sf9 cells, as for EPCR, or  
243 PBS-44, the latter being an exogenous ligand of known avidity for NKT-cells. Both the  
244 presence of endogenous lipids and PBS-44 resulted in a pronounced increase in T-cell  
245 staining prevalent in the CD4<sup>+</sup>CD8<sup>-</sup> pool. Phenotypically, EPCR-T-cells are also found  
246 primarily in the CD4<sup>+</sup>CD8<sup>-</sup> population, and less abundantly in the CD4<sup>+</sup>CD8<sup>+</sup> panel. The  
247 absence of a random distribution further supports the specificity of the staining with EPCR-  
248 ST.

249 Our next aim focused on determining the TCR class associated to EPCR-T-cells. Co-staining  
250 of CD3<sup>+</sup>endo-EPCR-ST<sup>+</sup> T-cells with anti- $\alpha/\beta$  or anti- $\gamma/\delta$  human TCR resulted in a strongly  
251 leading  $\alpha/\beta$  signal, as expressed by a frequency above 90 %. Nevertheless, a scarcely  
252 populated subset of  $\gamma/\delta$  T-cells also appears to contribute to EPCR-self-recognition. In this

253 line, two independent studies have described the presence of  $\gamma/\delta$  T-cells that specifically  
254 recognize EPCR in disease conditions<sup>23,24</sup>. Willcox and colleagues report  $\gamma/\delta$  TCR binding to  
255 EPCR in endothelial and epithelial tumors regardless of the lipid bound. Indeed, the target  
256 site is localized in the underside of EPCR. In a later study, Mantri *et al.* report  $\gamma/\delta$  T-cells to  
257 target mast cells in an EPCR-dependent manner, and propose a novel link to immune  
258 protection of the host against infection by dengue.

259 The T-cell interactome is notably diverse, and both  $\alpha/\beta$  and  $\gamma/\delta$  T-cells have been linked with  
260 self-recognition mediated by varied types of antigen presenting molecules. Self-recognition  
261 of antigen presenting molecules has been reported for CD1a<sup>6,25</sup>, CD1b<sup>20,26</sup>, CD1c<sup>20</sup>,  
262 CD1d<sup>14,22,27</sup>, or MR1<sup>7</sup>, thus providing evidence for the rather complex molecular network  
263 associated to T-cells.

264 Because the class and relative abundance of the bound lipids could play a role in the  
265 recruitment of EPCR-T-cells, we mapped the lipid profile of EPCR and revealed PS, PI and  
266 SM species in low quantities. Our structural approach supports major phospholipid  
267 abundance yet with heterogeneous polar head groups. The discovery of these novel species is  
268 of relevance considering the biological roles of these lipids in blood haemostasis<sup>28</sup>, the  
269 presence of functional -OH groups or their structural analogy to glycolipids that are potent  
270 activators of NKT-cells<sup>3,29,30</sup>.

271 These studies provide the first evidences for circulating  $\alpha/\beta$  T-cells in healthy individuals that  
272 self-recognize the non-canonical antigen presenting molecule EPCR. Our results suggest a  
273 “silent” or “encrypted” EPCR whose recognition is primarily guided by the protein fraction  
274 of the receptor-lipid complex. Like alpha-galactosylceramide, which is capable of switching  
275 CD1d into a potent antigen presenting molecule for NKT cells, the binding of self and foreign  
276 lipids warrants further investigation on the potential of EPCR to orchestrate T-cell responses  
277 in scenarios such as autoimmune disease or microbial infections.

278

## 279 References

280

- 281 1. Bendelac, A., Savage, P. B. & Teyton, L. The biology of NKT cells. *Annu. Rev.*  
282 *Immunol.* **25**, 297–336 (2007).
- 283 2. Borg, N. A. *et al.* CD1d-lipid-antigen recognition by the semi-invariant NKT T-cell  
284 receptor. *Nature* **448**, 44–49 (2007).
- 285 3. Zajonc, D. M. & Girardi, E. Recognition of Microbial Glycolipids by Natural Killer T  
286 Cells. *Front. Immunol.* **6**, 400 (2015).
- 287 4. Hennecke, J. & Wiley, D. C. T cell receptor-MHC interactions up close. *Cell* **104**, 1–4  
288 (2001).
- 289 5. Wilson, I. A. & Stanfield, R. L. 50 Years of Structural Immunology. *J. Biol. Chem.*  
290 100745 (2021). doi:10.1016/j.jbc.2021.100745
- 291 6. Cotton, R. N. *et al.* CD1a selectively captures endogenous cellular lipids that broadly  
292 block T cell response. *J. Exp. Med.* **218**, (2021).
- 293 7. Le Nours, J. *et al.* A class of  $\gamma\delta$  T cell receptors recognize the underside of the antigen-  
294 presenting molecule MR1. *Science* **366**, 1522–1527 (2019).
- 295 8. Shahine, A., Wegrecki, M. & Le Nours, J. Novel Molecular Insights into Human  
296 Lipid-Mediated T Cell Immunity. *Int. J. Mol. Sci.* **22**, (2021).
- 297 9. Gherardin, N. A., McCluskey, J., Rossjohn, J. & Godfrey, D. I. The Diverse Family of  
298 MR1-Restricted T Cells. *J. Immunol.* **201**, 2862–2871 (2018).
- 299 10. Fukudome, K. & Esmon, C. T. Identification, cloning, and regulation of a novel

- 300 endothelial cell protein C/activated protein C receptor. *J. Biol. Chem.* **269**, 26486–  
301 26491 (1994).
- 302 11. Oganessian, V. *et al.* The crystal structure of the endothelial protein C receptor and a  
303 bound phospholipid. *J Biol Chem* **277**, 24851–24854 (2002).
- 304 12. Lopez-Sagaseta, J. *et al.* sPLA2-V inhibits EPCR anticoagulant and antiapoptotic  
305 properties by accommodating lysophosphatidylcholine or PAF in the hydrophobic  
306 groove. *Blood* **119**, 2914–2921 (2012).
- 307 13. Fox, L. M. *et al.* Recognition of lyso-phospholipids by human natural killer T  
308 lymphocytes. *PLoS Biol* **7**, e1000228 (2009).
- 309 14. Mallevaey, T. *et al.* A molecular basis for NKT cell recognition of CD1d-self-antigen.  
310 *Immunity* **34**, 315–326 (2011).
- 311 15. Lopez-Sagaseta, J., Sibener, L. V, Kung, J. E., Gumperz, J. & Adams, E. J.  
312 Lysophospholipid presentation by CD1d and recognition by a human Natural Killer T-  
313 cell receptor. *EMBO J.* **31**, 2047–2059 (2012).
- 314 16. Schaffner, F. *et al.* Endothelial protein C receptor function in murine and human breast  
315 cancer development. *PLoS One* **8**, e61071 (2013).
- 316 17. Kerschen, E. *et al.* Activated protein C targets CD8+ dendritic cells to reduce the  
317 mortality of endotoxemia in mice. *J. Clin. Invest.* **120**, 3167–3178 (2010).
- 318 18. Gherardin, N. A. *et al.* CD36 family members are TCR-independent ligands for CD1  
319 antigen-presenting molecules. *bioRxiv* 2021.03.10.434884 (2021).  
320 doi:10.1101/2021.03.10.434884
- 321 19. Stow, S. M. *et al.* An Interlaboratory Evaluation of Drift Tube Ion Mobility-Mass  
322 Spectrometry Collision Cross Section Measurements. *Anal. Chem.* **89**, 9048–9055  
323 (2017).
- 324 20. Wun, K. S. *et al.* T cell autoreactivity directed toward CD1c itself rather than toward  
325 carried self lipids. *Nat. Immunol.* **19**, 397–406 (2018).
- 326 21. Birkinshaw, R. W. *et al.*  $\alpha\beta$  T cell antigen receptor recognition of CD1a presenting self  
327 lipid ligands. *Nat. Immunol.* **16**, 258–266 (2015).
- 328 22. López-Sagaseta, J., Sibener, L. V, Kung, J. E., Gumperz, J. & Adams, E. J.  
329 Lysophospholipid presentation by CD1d and recognition by a human Natural Killer T-  
330 cell receptor. **31**, 2047–2059 (2012).
- 331 23. Willcox, C. R. *et al.* Cytomegalovirus and tumor stress surveillance by binding of a  
332 human gammadelta T cell antigen receptor to endothelial protein C receptor. *Nat*  
333 *Immunol* **13**, 872–879 (2012).
- 334 24. Mantri, C. K. & St John, A. L. Immune synapses between mast cells and gammadelta  
335 T cells limit viral infection. *J. Clin. Invest.* (2018). doi:10.1172/JCI122530
- 336 25. de Jong, A. *et al.* CD1a-autoreactive T cells are a normal component of the human  $\alpha\beta$   
337 T cell repertoire. *Nat. Immunol.* **11**, 1102–1109 (2010).
- 338 26. Reijneveld, J. F. *et al.* Human  $\gamma\delta$  T cells recognize CD1b by two distinct mechanisms.  
339 *Proc. Natl. Acad. Sci. U. S. A.* **117**, 22944–22952 (2020).
- 340 27. Fox, L. M. *et al.* Recognition of lyso-phospholipids by human natural killer T  
341 lymphocytes. *PLoS Biol.* **7**, e1000228 (2009).
- 342 28. Spronk, H. M. H., ten Cate, H. & van der Meijden, P. E. J. Differential roles of tissue  
343 factor and phosphatidylserine in activation of coagulation. *Thromb. Res.* **133 Suppl**,  
344 S54-6 (2014).
- 345 29. Carreño, L. J., Kharkwal, S. S. & Porcelli, S. A. Optimizing NKT cell ligands as  
346 vaccine adjuvants. *Immunotherapy* **6**, 309–320 (2014).
- 347 30. Brennan, P. J. *et al.* Activation of iNKT cells by a distinct constituent of the  
348 endogenous glucosylceramide fraction. *Proc. Natl. Acad. Sci. U. S. A.* **111**, 13433–  
349 13438 (2014).
- 350



351 **Acknowledgements**

352 Jacinto López-Sagasetta is a Ramón y Cajal Investigator. We thank the staff of XALOC  
353 beamline at ALBA Synchrotron and staff of X06DA-PXIII beamline at Paul Scherrer  
354 Institute for their assistance with X-ray diffraction data collection. We thank all donors for  
355 the blood samples provided for this study. We thank Antonia García and Francisco Javier  
356 Rupérez for their support with mass spectrometry analyses. We thank Paul B. Savage,  
357 Manuel Gómez del Moral Martín-Consuegra and Daniel Ajona for provision of PBS44,  
358 CD1d cDNA and human lung RNA, respectively.

359 **Funding:**

360 Ramón y Cajal, Grant RYC-2017-21683, Ministry of Science and Innovation, Government of  
361 Spain (JLS). Generación de Conocimiento, Ministry of Science and Innovation, Government  
362 of Spain, Grant PGC2018-094894-B-I00 (JLS and EEA). Ministry of Science, Innovation and  
363 Universities of Spain (MICINN) and The European Regional Development Fund (FEDER)  
364 funding Grant RTI2018-095166-B-I00 (Antonia García y Francisco Javier Rupérez).  
365 Predoctoral Fellowship, Ministry of Universities, Government of Spain, Grant FPU19/06206  
366 (MMG).

367 **Author contributions:**

368 Conceived research project: JLS

369 Performed experiments: EE, MMG, JSG, GDR, JLS

370 Data analysis: EEA, MMG, NR, JS, CB, JLS

371 Draft writing: EE, JS, NR, JLS

372 **Competing interests:** The authors declare that they have no conflict of interest.

373 **Data availability:**

374 All data are available in the main text or supplementary materials. Materials are available  
375 from J.L.S., C.B. and N.R. upon reasonable request. Coordinates and structure factors for  
376 EPCR in space groups  $P3_121$ ,  $C222_1$ ,  $P2_12_12_1$  and for T20-treated EPCR have been deposited  
377 in the Protein Data Bank under the accession codes 7OKS, 7OKT, 7OKU and 7OKV,  
378 respectively.

379 **Supplementary Materials**

380 Materials and Methods

381 References 1 to 13

382 Figs. S1 to S13

383 Tables S1 to S3

384

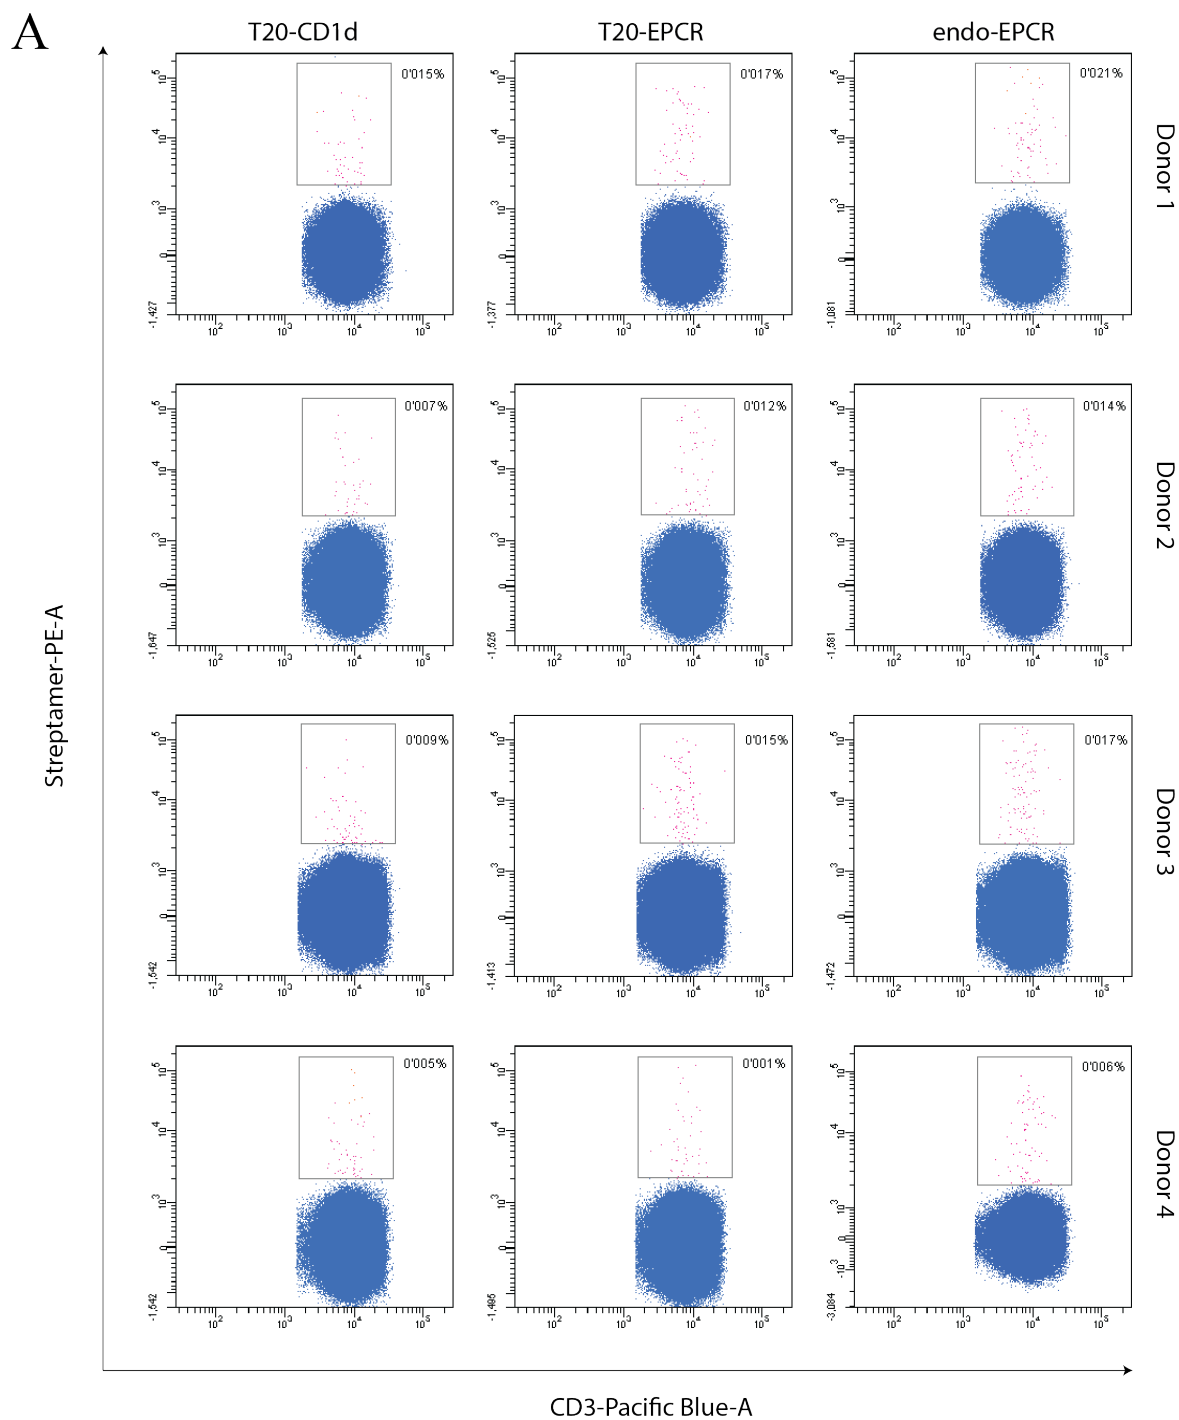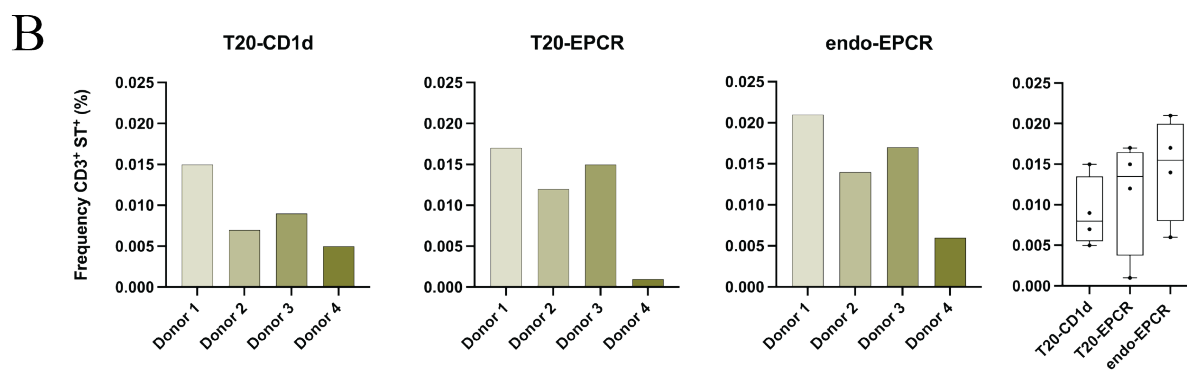

385  
386

387 **Fig. 1. Identification of EPCR-specific CD3<sup>+</sup>ST<sup>+</sup> cells in monocyte-depleted PBMCs of**  
388 **healthy donors. A,** Flow cytometry dot plots showing CD3<sup>+</sup> T-cell staining by streptamers  
389 bound to T20-treated CD1d, T20-treated EPCR or endo-EPCR and conjugated to  
390 phycoerythrin. Staining was performed in monocyte-depleted PBMCs for four different  
391 healthy donors as indicated. CD3<sup>+</sup>ST<sup>+</sup> staining is highlighted in magenta. All analyses were  
392 performed following the same gating strategy. Background signals of streptamer backbone  
393 has been subtracted in all dot plots. **B,** Frequencies (%) of CD3<sup>+</sup>ST<sup>+</sup> cells for each donor and  
394 streptamer version used for staining. Background signal of streptactin-PE backbone has been  
395 subtracted.  
396  
397

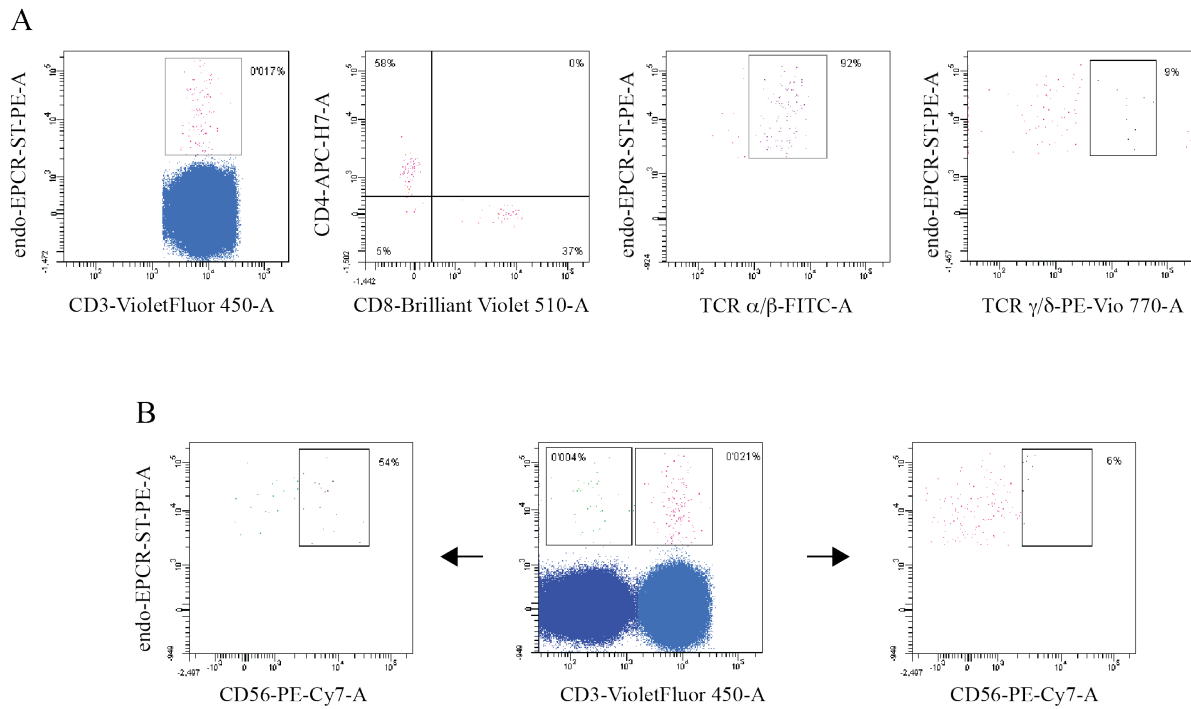

398  
399  
400  
401  
402  
403  
404  
405

**Fig. 2. Phenotype analysis of the endo-EPCR-ST<sup>+</sup> subpopulation.** **A**, CD3<sup>+</sup>endo-EPCR-ST<sup>+</sup> cells were evaluated in donor 3 according to the expression of the following T-cell markers: CD4, CD8, TCR $\alpha/\beta$  and TCR $\gamma/\delta$ . **B**, representative flow cytometry assessment of the natural killer cell marker CD56 (donor 1) for endo-EPCR-ST<sup>+</sup> cells classified by CD3<sup>+</sup> (T-cells) or CD3<sup>-</sup> (NK cells).

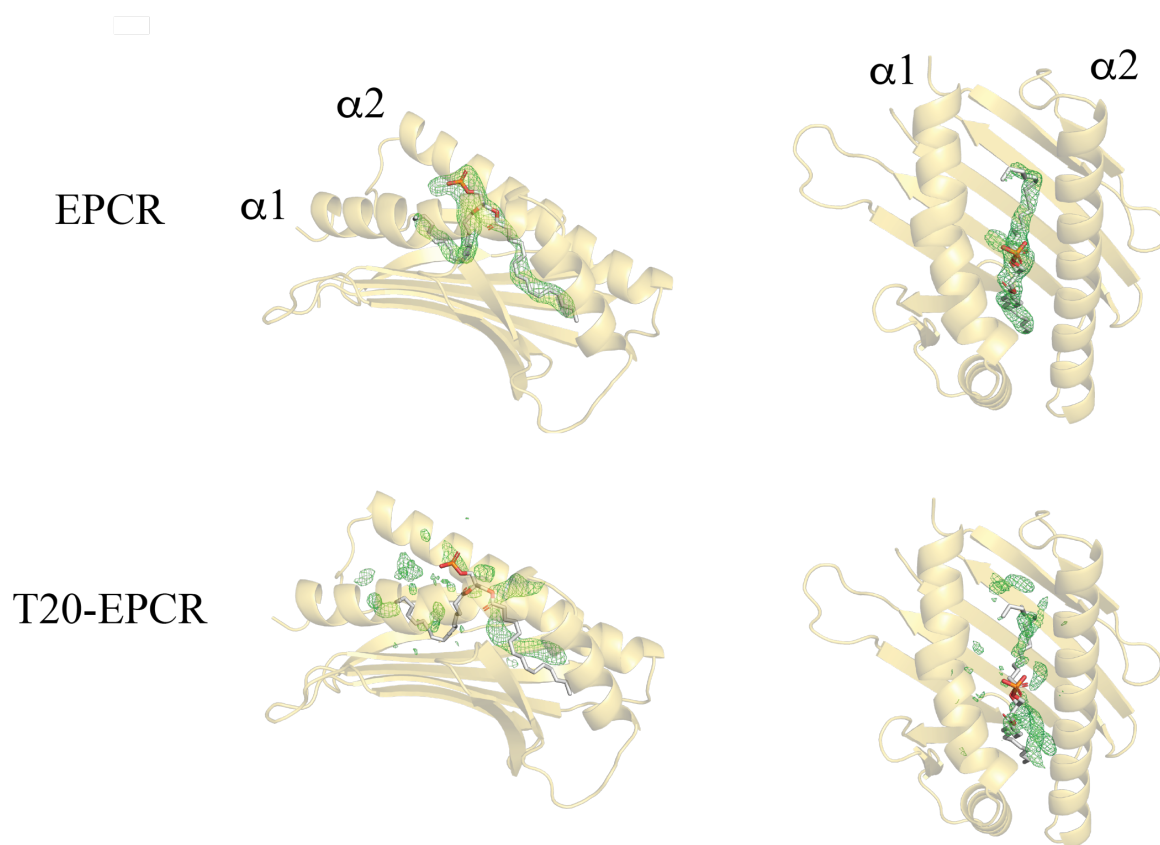

406

407

408 **Fig. 3. Treatment of EPCR with tween 20 alters the lipid content.** Side and top views  
409 shown in cartoon mode for EPCR structures determined with and without previous T20  
410 treatment. The alpha 1 and 2 helices are indicated. The Fo-Fc omit map for the lipid binding  
411 site is displayed at a contour level of 3 in green color. A phospholipid molecule fitting the  
412 electron density is shown in both structures to appreciate the effect of T20 treatment. The  
413 polar group bound to the phosphate has been omitted.



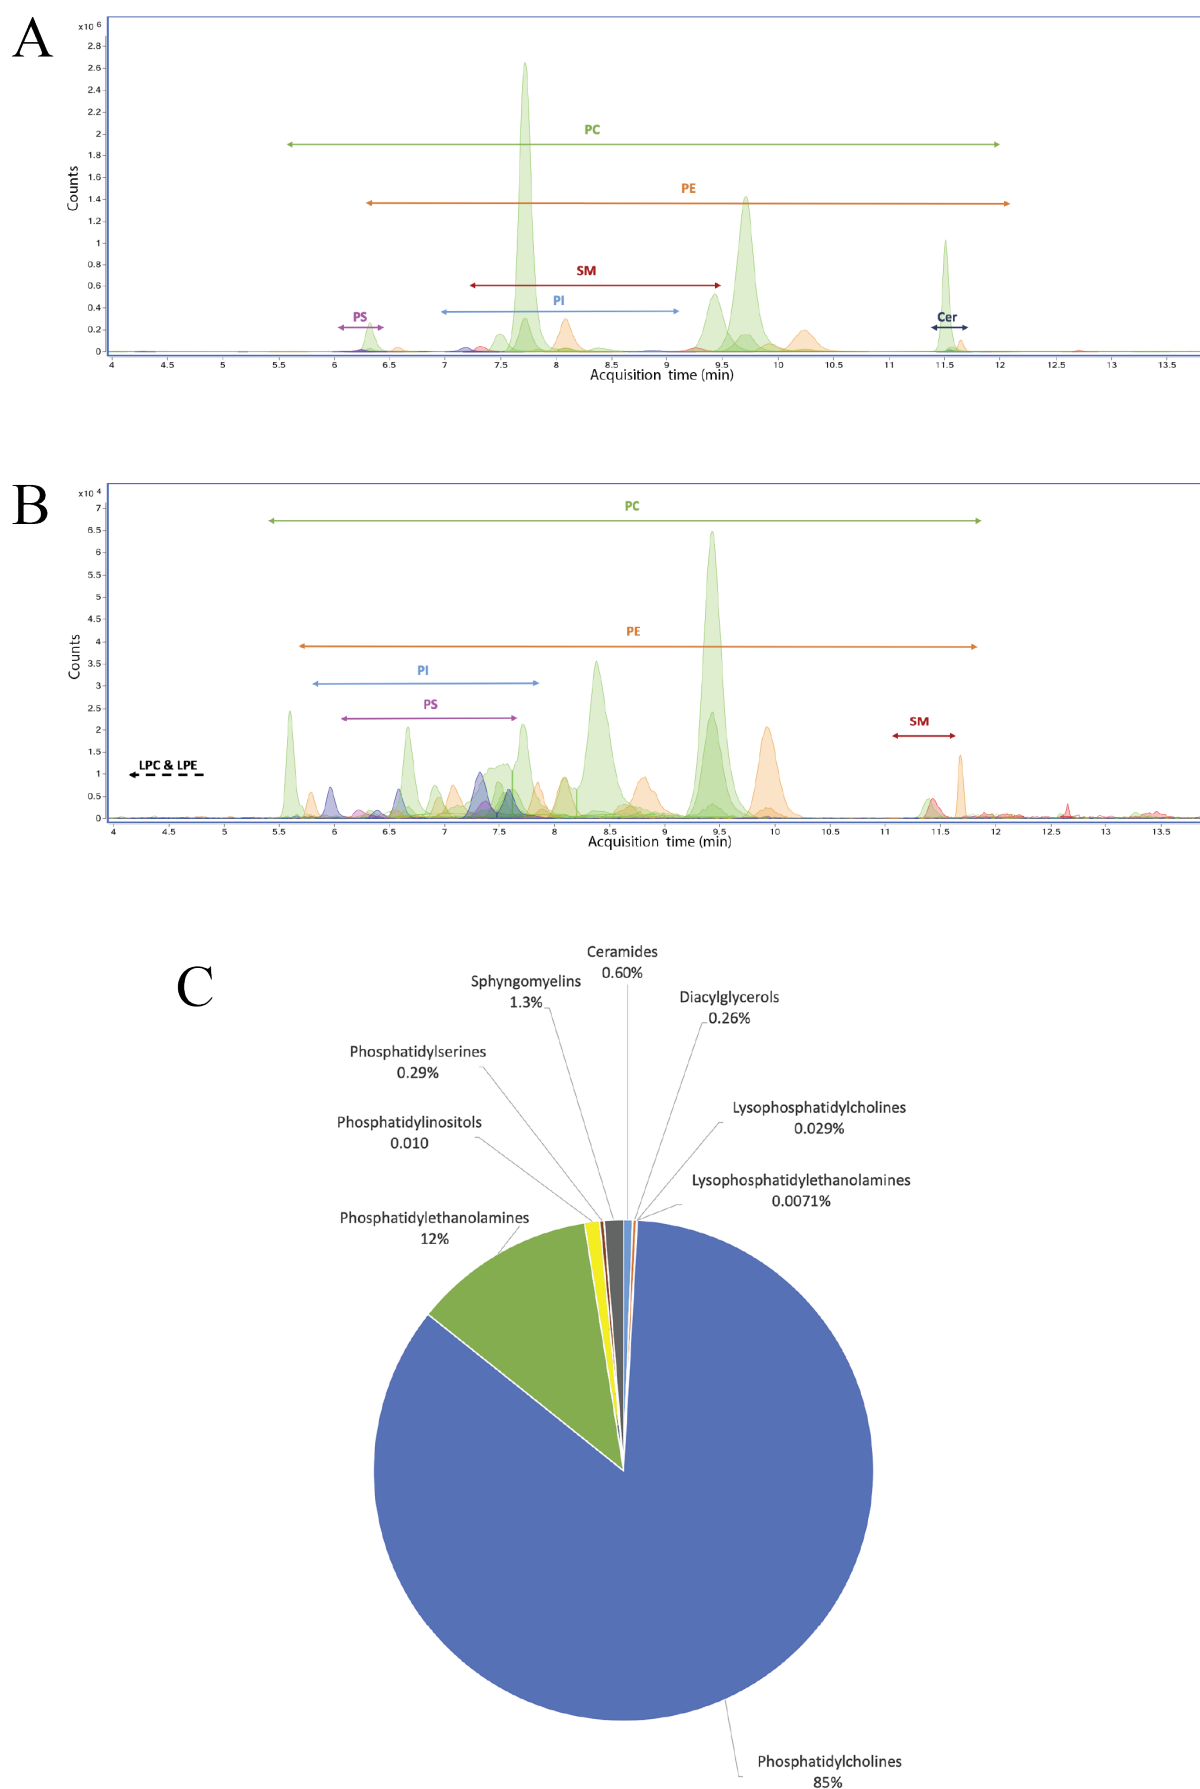

414

415 **Fig. 4. Extracted ion chromatogram of relevant lipids found in the native EPCR.**  
 416 Retention times associated to each lipid class identified in the sEPCR organic extract. The

417 arrows indicate the chromatographic region where each lipid class elutes. The figure is  
418 divided showing lipids with major (**A**) and minor (**B**) abundances in the sEPCR pool of  
419 extracted lipids. The experimental conditions are described in section Materials and Methods  
420 in the supplementary data. **C**, distribution of the different sEPCR lipid classes.

421

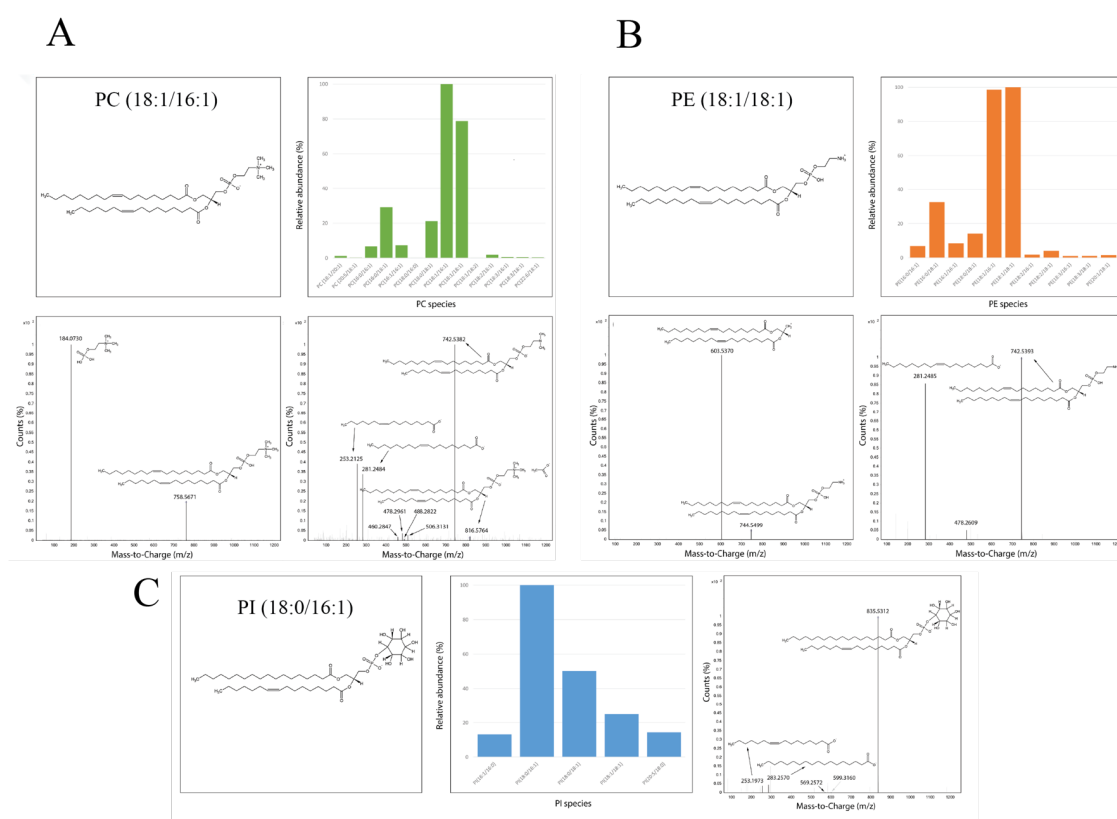

422

423 **Fig. 5. Major phospholipid species extracted from EPCR.** A schematic structure for the  
 424 most abundant species and their distribution is shown for PC (A), PE (B) and PI (C)  
 425 species, as determined by LC-MS analysis. Fragmentation patterns in positive (PC and PE) and  
 426 negative (PC, PE and PI) ionization modes are included.

427

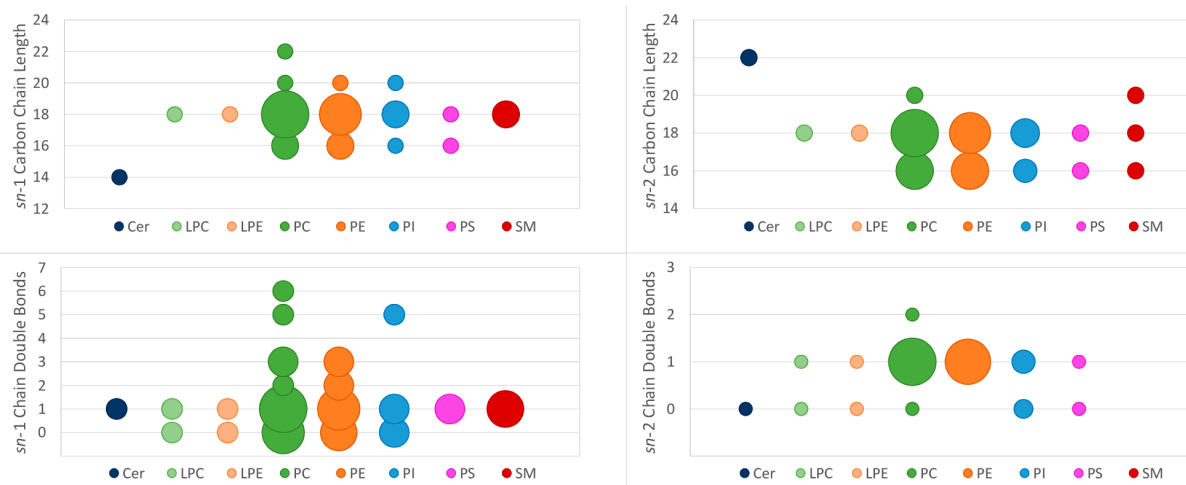

428

429 **Fig. 6. Acyl chain lengths and unsaturation degree in each lipid class.** Y-axis represents  
 430 the characteristic analyzed and x-axis contains each lipid class with each corresponding color.  
 431 Bubble sizes are proportional to the number of lipids at each data point. **(A)** Analysis of the  
 432 sn-1 carbon chain length in each lipid class. The most common length was of 18 carbon for  
 433 most lipid classes. **(B)** Analysis of the sn-2 carbon chain length in each lipid class. The most  
 434 common lengths were of 18 and 16 carbon for most lipid classes. **(C)** Analysis of the sn-1  
 435 chain double bonds, regardless of the chain length. Most lipid classes had either 0 or 1 double  
 436 bond in sn-1. **(D)** Analysis of the sn-2 chain double bonds, regardless of the chain length.  
 437 Most lipid classes had 1 double bond in sn-2.  
 438
